# Supplementary material for: Effects of nutrition counselling and unconditional cash transfer on child growth and family food security in internally displaced person camps in Somalia – A quasi-experimental study
Source: Research Square preprint supplement (doi:10.21203/rs.3.rs-1311760/v1), 2022-02-07
Supplement: Supplementary file 2 [file a4e6fe078fc0090960adc5f9.docx]

**Supplementary File 1: Intervention effects on children’s weight-for-height, weight-for-age and height-for-age Z scores**

|  | **Baseline** | **Follow-up** | **Absolute change in mean z score between baseline and follow-up** | **Adjusted coefficient (95% CI)** | ***p*** |
| --- | --- | --- | --- | --- | --- |
| **WHZ, mean (SD)** |  |  |  |  |  |
| NC | -0.73(1.08) | -0.58(1.39) | -0.15 | 0.20 (-0.31-0.72) | 0.438 |
| NC+UCT | -0.96(1.02) | -0.66(1.34) | -0.3 | -0.35(-0.21-0.92) | 0.220 |
| Control | -0.67(1.05) | -0.73(1.29) | 0.06 |  |  |
| **WAZ, mean (SD)** |  |  |  |  |  |
| NC | -1.46(1.16) | -1.83(1.05) | 0.37 | -0.99(-0.53-3.27) | 0.648 |
| NC+UCT | -1.75(1.01) | -1.79(1.22) | 0.04 | 0.26(-0.18-0.71) | 0.251 |
| Control | -1.57(1.13) | -1.87(1.10) | 0.3 |  |  |
| **HAZ, mean (SD)** |  |  |  |  |  |
| NC | -1.72(1.59) | -2.46(1.38) | 0.74 | -0.26(-0.74-0.22) | 0.288 |
| NC+UCT | -1.95(1.53) | -2.36(1.55) | 0.41 | 0.04(-0.42-0.50) | 0.861 |
| Control | -1.95(1.51) | -2.35(1.44) | 0.4 |  |  |
